# Supplementary material
Source: PubMed Central journal article supplement (PMC4904291)
Supplement: supp_fj.201500112_Supplemental_Figures.pdf [file supp_fj.201500112_Supplemental_Figures.pdf]

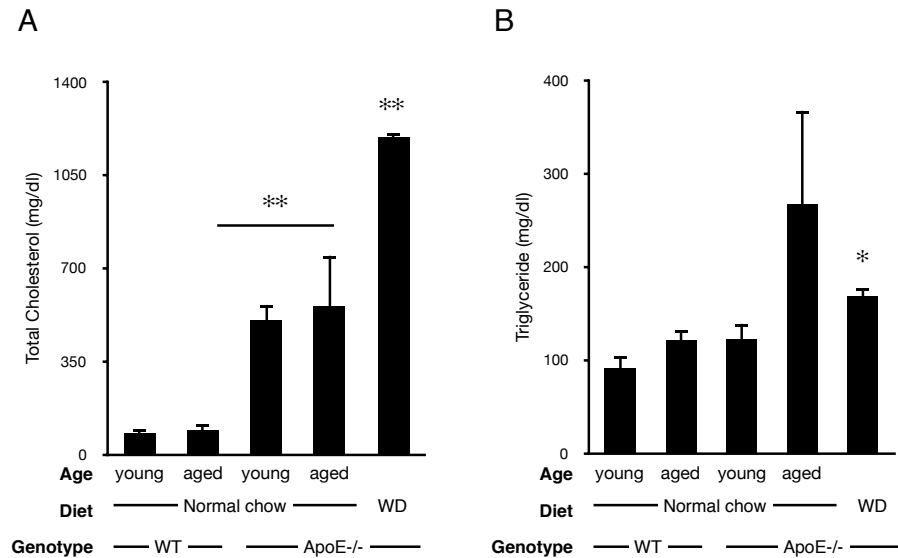

**Supplemental Figure 1: A)** Total cholesterol and **B)** triglyceride plasma levels of (young WT:  $n=4$ , 8-12 weeks, M/F 0.5; aged WT:  $n=4$ , 54-58 weeks, M/F 0.5; young apoE<sup>-/-</sup>:  $n=4$ , 8-12 weeks, M/F 0.5; aged apoE<sup>-/-</sup>:  $n=4$ , 54-58 weeks, M/F 0.5; WD:  $n=4$ , 32 weeks, M/F 0.5). Plasma cholesterol and triglyceride levels were measured within 3 hours of obtaining the blood from the animals, mean $\pm$ SEM. \* $P<0.05$ , \*\* $P<0.01$ .

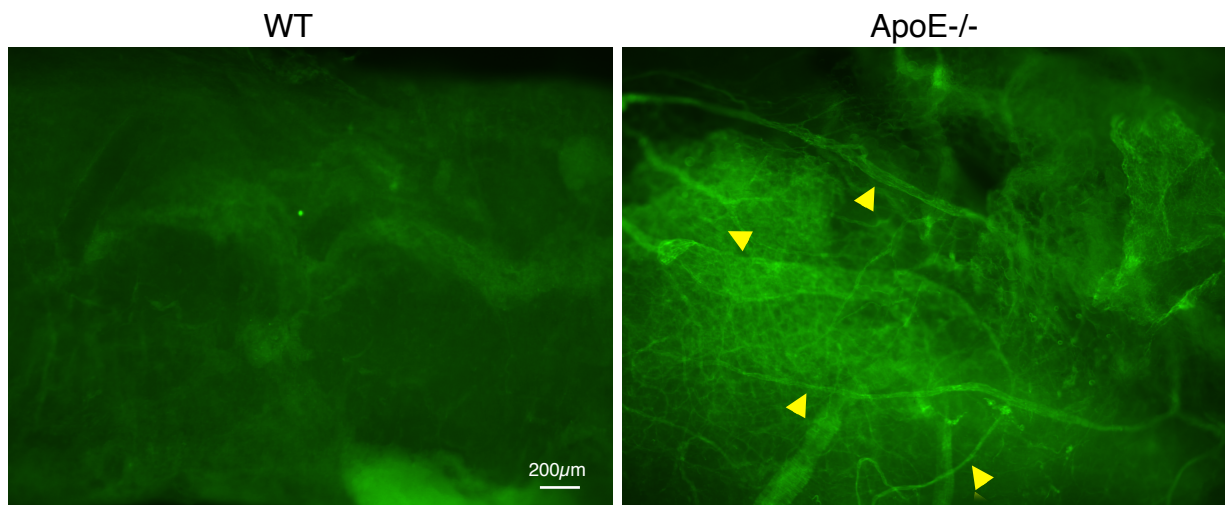

**Supplemental Figure 2:** Representative whole mount immunofluorescence staining of abdominal aortas for the endothelial cell marker CD31 (green). Atherosclerotic aortas showed increased adventitial angiogenesis (arrowheads) compared to wild type controls. *Left*, aged WT (57 week old male). *Right*, aged apoE<sup>-/-</sup> (58 week old male).
